# Supplementary material for: Impact of precisely-timed inhibition of gustatory cortex on taste behavior depends on single-trial ensemble dynamics
Source: eLife journal article supplement (doi:10.7554/elife.45968), 2019-06-24
Supplement: supp [file elife-45968-supp-v1.zip]

Archive with 1 entries (1 files):
- elife_poa_e45968_Transparent_Reporting_File.pdf
